# Supplementary material for: Temporal and Weight-Related Variations in Chest Compression Quality during CPR: A 30-Second Interval Manikin Study
Source: Research Square preprint supplement (doi:10.21203/rs.3.rs-7134265/v1), 2025-09-01
Supplement: Supplementary file 1 [file 0e9b5711c0b379dda22f7e49.docx]

**Supplementary Table 1. Effective Chest Compressions and Compression Rate by Sex across 30-Second Intervals during the Second 2-Minute Cycle of CPR**

| **Interval (sec)** | **Female Effective Compressions (Mean ± SD)** | **Male Effective Compressions (Mean ± SD)** |
| --- | --- | --- |
| 0–30 | 17.80 ± 16.13 | 37.55 ± 9.56 |
| 30–60 | 15.38 ± 17.25 | 41.18 ± 12.19 |
| 60–90 | 13.13 ± 17.18 | 39.63 ± 13.69 |
| 90–120 | 13.19 ± 18.56 | 42.98 ± 17.29 |
| **Interval (sec)** | **Female Compression Rate (compressions/min, Mean ± SD)** | **Male Compression Rate (compressions/min, Mean ± SD)** |
| 0–30 | 41.04 ± 8.90 | 48.51 ± 13.43 |
| 30–60 | 42.94 ± 8.59 | 52.86 ± 10.51 |
| 60–90 | 42.72 ± 10.53 | 52.02 ± 8.78 |
| 90–120 | 45.80 ± 9.94 | 54.98 ± 8.26 |

**Supplementary Table 2. Effective Chest Compressions and Compression Rate by Sex across 30-Second Intervals during the Third 2-Minute Cycle of CPR**

| **Interval (sec)** | **Female Effective Compressions (Mean ± SD)** | **Male Effective Compressions (Mean ± SD)** |
| --- | --- | --- |
| 0–30 | 19.72 ± 16.24 | 37.73 ± 10.53 |
| 30–60 | 17.58 ± 17.82 | 38.39 ± 12.14 |
| 60–90 | 15.26 ± 16.98 | 36.18 ± 15.25 |
| 90–120 | 14.75 ± 18.58 | 38.71 ± 18.85 |
| **Interval (sec)** | **Female Compression Rate (compressions/min, Mean ± SD)** | **Male Compression Rate (compressions/min, Mean ± SD)** |
| 0–30 | 41.43 ± 11.69 | 49.53 ± 12.08 |
| 30–60 | 42.85 ± 11.28 | 52.69 ± 11.71 |
| 60–90 | 42.28 ± 11.17 | 51.53 ± 10.31 |
| 90–120 | 45.11 ± 12.33 | 56.10 ± 9.73 |
